# Supplementary material
Source: ML conference proceedings conference paper supplement (https://proceedings.mlr.press/v48/kawakita16.html)
Supplement: Supplementary file 1 [file kawakita16-supp.pdf]

# Supplementary Material

M. Kawakita and J. Takeuchi

May 27, 2016

## 1 Sketch of the Proof of Lemma 2

*Proof.* We describe a sketch of the proof. Note that  $w_j^2$  is subject to a Gamma distribution  $\text{Ga}(n/2, 2\eta/n)$  with  $\eta = w_j^{*2}$ . It forms an exponential family, of which  $w_j^2$  is a sufficient statistic and  $\eta$  is the expectation parameter. Noting that the KL-divergence from  $\eta = (1 \pm \epsilon)w_j^{*2}$  to  $\eta = w_j^{*2}$  is  $(n/2)(\pm\epsilon - \log(1 \pm \epsilon))$ , we can prove (8) by using a large deviation inequality shown in Csiszar (1984). The next inequality follows from  $(1-t)^p \geq 1-pt$  for any  $t \in [0, 1]$  and  $p \geq 1$ . To simplify the bound, we can do more. The maximum positive real number  $a$  such that, for any  $\epsilon \in [0, 1]$ ,  $a\epsilon^2 \leq (1/2)(\epsilon - \log(1 + \epsilon))$  is  $(1 - \log 2)/2$ . Then, the maximum integer  $z$  such that  $(1 - \log 2)/2 \geq 1/z$  is 7, which gives the last inequality.  $\square$

### 1.1 Proof of Theorem 6

It is not necessary to start from scratch. We reuse the proof of Theorem 5 in the manuscript.

*Proof.* We can start from (13) in the manuscript. For convenience, we define

$$\begin{aligned}\xi(x^n, y^n) &= \frac{1}{n} \max_{\theta \in \Theta} \left\{ F_\lambda^\theta(x^n, y^n) - L(\theta|x^n) \right\} \\ &= \max_{\theta \in \Theta} \left\{ \frac{d_\lambda^n(p_*, p_\theta)}{n} - \frac{1}{n} \log \frac{p_*(y^n|x^n)}{p_\theta(y^n|x^n)} - \frac{L(\theta|x^n)}{n} \right\}.\end{aligned}$$

By Markov's inequality and (13),

$$\begin{aligned}\Pr(\xi(x^n, y^n) \geq \tau | x^n \in A_\epsilon^n) &= \Pr\left(\exp\left(\frac{n\xi(x^n, y^n)}{\beta}\right) \geq \exp\left(\frac{n\tau}{\beta}\right) \middle| x^n \in A_\epsilon^n\right) \\ &\leq \frac{\exp\left(-\frac{n\tau}{\beta}\right)}{P_\epsilon^n}.\end{aligned}$$

Hence, we obtain

$$\begin{aligned}\Pr(\xi(x^n, y^n) \geq \tau) &= P_\epsilon^n \Pr(\xi(x^n, y^n) \geq \tau | x^n \in A_\epsilon^n) + (1 - P_\epsilon^n) \Pr(\xi(x^n, y^n) \geq \tau | x^n \notin A_\epsilon^n) \\ &\leq P_\epsilon^n \Pr(\xi(x^n, y^n) \geq \tau | x^n \in A_\epsilon^n) + (1 - P_\epsilon^n) \\ &\leq \exp(-n\tau/\beta) + (1 - P_\epsilon^n).\end{aligned}$$

The proof completes by noticing that  $(1/n) \left( F_\lambda^{\hat{\theta}}(x^n, y^n) - L(\hat{\theta}|x^n) \right) \leq \xi(x^n, y^n)$  for any  $x^n$  and  $y^n$ .  $\square$

## References

Csiszar, I. Sanov property, generalized I-projection and a conditional limit theorem. *The Annals of Probability*, 12:768–793, 1984.
